# Supplementary material
Source: publisher figshare collection journal article supplement (https://karger.figshare.com/ndownloader/files/26848559)
Supplement: Supplementary file 1 [file 26848559]

## Sheet: Genes in DSM20547 but not MBB13
Gene	Coordinates		Strand	Predicted function (pseudogenes are shown as empty cells)	Locus includes a transposase/integrase family protein	Number of genes in locus
Ksed_00260	27840	28568	c	hypothetical protein		2
Ksed_00270	28602	30221	c	phosphate/sulfate permease
Ksed_00630	70536	70874		SH3 domain-containing protein	Y	10
Ksed_00640	70879	71289	c	transposase family protein
Ksed_00650	71456	71599		hypothetical protein
Ksed_00660	71691	72971		transposase
Ksed_00670	72968	73372		hypothetical protein
Ksed_00680	73394	73657	c
Ksed_00690	73718	74986		flavodoxin reductase family protein
Ksed_00700	75123	75733
Ksed_00710	75743	76267	c	hypothetical protein
Ksed_00720	77048	77671	c	Protein of unknown function (DUF1648)
Ksed_00760	81135	82472	c	diaminopimelate decarboxylase		4
Ksed_00770	82523	83797	c	LL-diaminopimelate aminotransferase
Ksed_00780	83869	84795	c	dihydrodipicolinate synthase
Ksed_00790	84792	85601	c	dihydrodipicolinate reductase
Ksed_00880	94172	95548	c	sugar phosphate permease		9
Ksed_00890	95720	96109		predicted transcriptional regulator
Ksed_00900	96224	97285	c	Major Facilitator Superfamily transporter
Ksed_00910	97291	97689	c	cation/cationic drug transporter
Ksed_00920	97754	99014	c
Ksed_00930	99134	99502	c	cation/cationic drug transporter
Ksed_00940	99499	100026	c	cytosine/adenosine deaminase
Ksed_00950	100023	100646	c	predicted dithiol-disulfide isomerase involved in polyketide biosynthesis
Ksed_00960	100729	101175	c	transcriptional regulator
Ksed_01170	124243	125499	c	Major Facilitator Superfamily transporter		31
Ksed_01180	125602	126456		transcriptional regulator
Ksed_01190	126704	127198	c	DNA-binding protein, excisionase family
Ksed_01200	127250	127489
Ksed_01210	127476	127907		acetyltransferase (GNAT) family protein
Ksed_01220	128095	128655	c	acetyltransferase (GNAT) family protein
Ksed_01230	128666	129643	c	proline iminopeptidase
Ksed_01240	129878	130939	c	arabinose efflux permease family protein
Ksed_01250	131100	131447		transcriptional regulator, ArsR family
Ksed_01260	131515	132318		CAAX amino terminal protease family
Ksed_01270	132407	132904	c	redox-sensitive transcriptional activator SoxR
Ksed_01280	133137	134729		ABC-type multidrug transport system, ATPase and permease component
Ksed_01290	134726	136471		ABC-type multidrug transport system, ATPase and permease component
Ksed_01300	136514	136828		predicted transcriptional regulator
Ksed_01310	136845	137861		acetyltransferase, ribosomal protein N-acetylase
Ksed_01320	138090	139055	c	hypothetical protein
Ksed_01330	139117	139515		hypothetical protein
Ksed_01340	139529	139786	c	toxin-antitoxin system, toxin component, Txe/YoeB family
Ksed_01350	139788	140045	c	prevent-host-death family protein
Ksed_01360	140155	140691		acetyltransferase, ribosomal protein N-acetylase
Ksed_01370	140695	141084		uncharacterized conserved protein
Ksed_01380	141262	142398		2-polyprenyl-6-methoxyphenol hydroxylase-like oxidoreductase
Ksed_01390	142474	142959		hypothetical protein
Ksed_01400	142997	143974	c	uncharacterized conserved protein (DUF2332)
Ksed_01410	143979	144680	c	methylase involved in ubiquinone/menaquinone biosynthesis
Ksed_01420	144787	145476	c	hypothetical protein
Ksed_01430	145514	145627	c
Ksed_01440	145664	145927		hypothetical protein
Ksed_01450	145997	146668		predicted O-methyltransferase
Ksed_01460	146695	146982
Ksed_01470	147102	148025		asparaginase
Ksed_01970	202053	202241	c			1
Ksed_01990	202718	203155	c	Protein of unknown function (DUF1428)		6
Ksed_02000	203155	203802	c	uncharacterized conserved protein
Ksed_02010	203799	204299	c	predicted esterase of the alpha/beta hydrolase fold family
Ksed_02020	204303	204995	c	dihydrofolate reductase
Ksed_02030	205082	205408	c	uncharacterized conserved protein
Ksed_02040	205438	205812	c	hypothetical protein
Ksed_02140	213123	213818		hypothetical protein	Y	2
Ksed_02150	213899	215206		transposase family protein
Ksed_02320	229121	230896	c	subtilisin-like serine protease		1
Ksed_02400	239427	240744	c			1
Ksed_02610	258071	258466				5
Ksed_02620	258907	260055	c	transcriptional regulator with HTH domain and aminotransferase domain
Ksed_02630	260099	261460	c	acetyltransferase (isoleucine patch superfamily)
Ksed_02640	261447	262076	c
Ksed_02650	262080	262202
Ksed_03050	293839	294276	c	hypothetical protein		1
Ksed_04270	417773	418918	c	threonine aldolase		1
Ksed_04840	479376	479849	c	DNA-binding protein, excisionase family		12
Ksed_04850	479965	480180	c	hypothetical protein
Ksed_04860	480652	481566	c	Integral membrane protein DUF6
Ksed_04870	481563	482504	c	cation diffusion facilitator family transporter
Ksed_04890	484140	484247	c	hypothetical protein
Ksed_04900	484404	485969	c	predicted multicopper oxidase
Ksed_04910	486582	487448	c	hypothetical protein
Ksed_04920	487668	488336		response regulator with CheY-like receiver domain and winged-helix DNA-binding domain
Ksed_04930	488333	489502		signal transduction histidine kinase
Ksed_04940	489574	489903		copper chaperone
Ksed_04950	489979	492219		copper/silver-translocatingP-type ATPase
Ksed_04960	492291	492989		uncharacterized conserved protein
Ksed_05270	521294	522052		hypothetical protein	Y	11
Ksed_05290	523889	524479	c	dihydrofolate reductase
Ksed_05300	524476	525024	c	transcriptional regulator, tetR family
Ksed_05310	525237	525389	c
Ksed_05320	525540	525884		transcriptional regulator, ArsR family
Ksed_05330	526009	526410	c	hypothetical protein
Ksed_05350	527928	528353		hypothetical protein
Ksed_05360	528529	529893	c	transposase family protein
Ksed_05370	529919	530512	c	hypothetical protein
Ksed_05380	530760	532046	c	hypothetical protein
Ksed_05390	532624	533517		hypothetical protein
Ksed_05430	536702	537952	c	transposase	Y	5
Ksed_05450	538776	539216		ketosteroid isomerase-like enzyme
Ksed_05460	539213	539602		conserved hypothetical protein
Ksed_05470	539599	540546		RNA polymerase sigma-70 factor, TIGR02960 family
Ksed_05480	540673	541815		penicillin-binding protein, beta-lactamase class C
Ksed_05730	574201	574599	c	hypothetical protein		4
Ksed_05740	574599	575234	c	hypothetical protein
Ksed_05750	575564	576670		hypothetical protein
Ksed_05770	579078	579635		acetyltransferase, ribosomal protein N-acetylase
Ksed_05820	582517	583077		Pyridoxamine 5'-phosphate oxidase		1
Ksed_06270	618204	618569		hypothetical protein	Y	53
Ksed_06280	618615	619613	c	hypothetical protein
Ksed_06290	619753	622887	c	hypothetical protein
Ksed_06300	623024	625588	c	hypothetical protein
Ksed_06310	625915	626022		hypothetical protein
Ksed_06320	626315	627979	c	dinucleotide-utilizing enzyme possibly involved in molybdopterin or thiamin biosynthesis
Ksed_06330	628066	629058	c	hypothetical protein
Ksed_06340	629055	629981	c	patatin
Ksed_06350	630285	630554	c	hypothetical protein
Ksed_06360	630616	630786	c	hypothetical protein
Ksed_06370	630858	631415	c	hypothetical protein
Ksed_06380	631606	632010	c	hypothetical protein
Ksed_06390	632007	633287	c	transposase
Ksed_06400	633384	633734	c	hypothetical protein
Ksed_06420	635684	635842		hypothetical protein
Ksed_06430	635832	636389	c	RNA polymerase sigma factor, sigma-70 family
Ksed_06450	640493	641215		dehydrogenase of unknown specificity, short-chain alcohol dehydrogenase like protein
Ksed_06460	641378	641875		RNA polymerase sigma factor, sigma-70 family
Ksed_06470	641872	642516		O-6-methylguanine DNA methyltransferase
Ksed_06480	642513	643241		uncharacterized conserved protein
Ksed_06490	643249	643521		hypothetical protein
Ksed_06500	643518	644051		hypothetical protein
Ksed_06510	644048	644719		DNA-N1-methyladenine dioxygenase
Ksed_06520	644768	645403		DNA-3-methyladenine glycosylase I
Ksed_06530	645400	646260		3-methyladenine DNA glycosylase/8-oxoguanine DNA glycosylase
Ksed_06540	646506	647342		DNA-binding domain-containing protein, AraC-type
Ksed_06550	647593	647733		hypothetical protein
Ksed_06560	647847	649094		transposase
Ksed_06570	649119	649982		protein of unknown function (DUF955)
Ksed_06580	649979	650932		DNA primase/polymerase-like protein
Ksed_06590	650974	651909		hypothetical protein
Ksed_06600	651996	652907		hypothetical protein
Ksed_06610	652904	653914		ParB-like nuclease
Ksed_06620	653997	654647		hypothetical protein
Ksed_06630	654662	656305		metalloendopeptidase-like membrane protein
Ksed_06640	656478	657599		site-specific recombinase XerD
Ksed_06650	657605	657943		hypothetical protein
Ksed_06660	657953	659617		hypothetical protein
Ksed_06670	659688	660182	c	hypothetical protein
Ksed_06680	660321	660923	c	transcriptional regulator
Ksed_06690	661003	661956		ABC-type multidrug transport system, ATPase component
Ksed_06700	662112	663602		putative exporter of polyketide antibiotics
Ksed_06710	663810	664124	c	hypothetical protein
Ksed_06720	664609	664875		hypothetical protein
Ksed_06730	664998	665309		hypothetical protein
Ksed_06740	665349	666836		hypothetical protein
Ksed_06750	666844	668307		hypothetical protein
Ksed_06760	668408	669274		hypothetical protein
Ksed_06780	670812	671336		hypothetical protein
Ksed_06790	671333	673117		hypothetical protein
Ksed_06800	673207	673650		single-stranded DNA-binding protein
Ksed_06810	673670	674293		hypothetical protein
Ksed_06820	674293	674535		hypothetical protein
Ksed_06980	693110	694426		transposase family protein	Y	1
Ksed_07190	719589	721010	c	Predicted permease		4
Ksed_07200	721007	721735	c	ABC-type antimicrobial peptide transport system, ATPase component
Ksed_07210	721855	722568		histidine kinase
Ksed_07220	722565	723245		response regulator containing a CheY-like receiver domain and an HTH DNA-binding domain
Ksed_07380	739195	740721		16S ribosomal RNA		3
Ksed_07390	741107	744192		23S ribosomal RNA
Ksed_07400	744345	744473		5S ribosomal RNA
Ksed_07920	800350	801616	c			1
Ksed_07990	808890	810479		site-specific recombinase, DNA invertase Pin	Y	13
Ksed_08000	811396	812286	c	DNA-binding domain-containing protein, AraC-type
Ksed_08010	812382	813566	c	arabinose efflux permease family protein
Ksed_08020	813668	814012		transcriptional regulator, ArsR family
Ksed_08030	814056	815222	c	arabinose efflux permease family protein
Ksed_08040	815286	815897	c	transcriptional regulator
Ksed_08050	816121	819603		TrwC relaxase
Ksed_08060	819722	820978	c	arabinose efflux permease family protein
Ksed_08070	821129	821446		transcriptional regulator, ArsR family
Ksed_08080	821584	822780	c	arabinose efflux permease family protein
Ksed_08090	822861	823664	c	transposase
Ksed_08100	823727	824062	c	Transposase
Ksed_08110	824152	824748		transcriptional regulator
Ksed_08270	841362	843152	c	ABC-type multidrug transport system, ATPase and permease component		3
Ksed_08280	843142	844965	c	ABC-type bacteriocin/lantibiotic exporter with N-terminal double-glycine peptidase domain
Ksed_08290	845019	845651		hypothetical protein
Ksed_08320	848383	849267		hypothetical protein		1
Ksed_08920	911275	911622		Glyoxalase/Bleomycin resistance protein/Dioxygenase superfamily		2
Ksed_08930	911689	913059	c	periplasmic protease
Ksed_09270	950835	952082		transposase	Y	1
Ksed_09970	1028058	1028861	c	hypothetical protein		2
Ksed_09990	1030139	1030582	c	hypothetical protein
Ksed_10050	1033465	1034286	c	hypothetical protein		4
Ksed_10070	1035620	1036258	c	hypothetical protein
Ksed_10080	1036257	1036448		hypothetical protein
Ksed_10090	1036571	1036891	c	predicted nucleotidyltransferase
Ksed_10210	1050124	1050369		hypothetical protein		1
Ksed_10270	1053792	1054211		hypothetical protein		2
Ksed_10280	1054266	1054397	c	hypothetical protein
Ksed_10950	1120761	1120856		hypothetical protein		1
Ksed_13230	1374925	1375356	c			8
Ksed_13240	1375470	1377116	c	hypothetical protein
Ksed_13250	1377113	1377817	c	ABC-type multidrug transport system, ATPase component
Ksed_13260	1377850	1378038	c	hypothetical protein
Ksed_13270	1378448	1379270
Ksed_13280	1379379	1379792	c	hypothetical protein
Ksed_13290	1379809	1380384	c	hypothetical protein
Ksed_13300	1380734	1381597	c	uncharacterized protein required for cytochrome oxidase assembly
Ksed_13450	1395308	1395463		hypothetical protein		1
Ksed_14330	1481660	1482340				2
Ksed_14340	1482394	1482753		uncharacterized conserved protein
Ksed_14380	1484521	1484874		phosphotransferase family protein		4
Ksed_14390	1484867	1485007		hypothetical protein
Ksed_14400	1485004	1485474		hypothetical protein
Ksed_14410	1485471	1485791		hypothetical protein
Ksed_14440	1486754	1488103		transposase	Y	1
Ksed_14480	1490473	1491261		inositol monophosphatase/fructose-1,6-bisphosphatase family protein		8
Ksed_14490	1491258	1491650		hypothetical protein
Ksed_14500	1491647	1492213		conserved protein containing a Zn-ribbon-like motif, possibly RNA-binding
Ksed_14510	1492213	1492848		putative threonine efflux protein
Ksed_14520	1492917	1493722
Ksed_14550	1495469	1495867		hypothetical protein
Ksed_14560	1495864	1496961		hypothetical protein
Ksed_14570	1496958	1497500		ADP-ribose pyrophosphatase
Ksed_14620	1501340	1502725		branched-chain amino acid uptake carrier		1
Ksed_15910	1636731	1637060		hypothetical protein		5
Ksed_15920	1637060	1637758		ABC-type multidrug transport system, ATPase component
Ksed_15930	1637831	1638925		hypothetical protein
Ksed_15940	1638919	1639551		hypothetical protein
Ksed_15950	1639564	1639929		hypothetical protein
Ksed_16850	1746467	1746997	c	hypothetical protein		1
Ksed_17070	1766874	1769969		DNA/RNA helicase, superfamily II	Y	3
Ksed_17080	1770027	1770362		Transposase
Ksed_17090	1770425	1771228		transposase
Ksed_17290	1791561	1792070	c	hypothetical protein		2
Ksed_17300	1792144	1792575	c	hypothetical protein
Ksed_17370	1801361	1802416	c	hypothetical protein	Y	8
Ksed_17580	1830744	1831379	c	response regulator containing a CheY-like receiver domain and an HTH DNA-binding domain
Ksed_17590	1831367	1832347	c	signal transduction histidine kinase
Ksed_17600	1832689	1834074	c	ABC-type transport system, involved in lipoprotein release, permease component
Ksed_17610	1834076	1834828	c	ABC-type antimicrobial peptide transport system, ATPase component
Ksed_17620	1835035	1836282		transposase
Ksed_17630	1836423	1837100	c	predicted transcriptional regulator
Ksed_17640	1837193	1838545		arabinose efflux permease family protein
Ksed_17670	1840814	1841653		hypothetical protein		1
Ksed_17750	1851803	1852177		Glyoxalase/Bleomycin resistance protein/Dioxygenase superfamily	Y	3
Ksed_17770	1852805	1853104		Transposase
Ksed_17780	1853101	1853326
Ksed_17820	1856135	1857423	c		Y	10
Ksed_17830	1857560	1858135	c
Ksed_17840	1858223	1859302	c	acetyltransferase, ribosomal protein N-acetylase
Ksed_17850	1859437	1859958		transcriptional regulator, tetR family
Ksed_17860	1860415	1861149	c	dimethyladenosine transferase (rRNA methylation)
Ksed_17870	1861637	1862924
Ksed_17900	1864260	1865147	c
Ksed_17910	1865144	1865449	c	Transposase
Ksed_17920	1865607	1866323	c	predicted transcriptional regulator
Ksed_17930	1866409	1867278		predicted nucleoside-diphosphate sugar epimerase
Ksed_18010	1873599	1873898	c	hypothetical protein	Y	2
Ksed_18020	1874172	1875521		transposase
Ksed_18520	1928676	1929428		3'-phosphoadenosine 5'-phosphosulfate (PAPS) 3'-phosphatase		1
Ksed_18580	1933235	1933735	c	dTDP-4-dehydrorhamnose 3,5-epimerase-like enzyme		3
Ksed_18590	1933834	1934634	c	UDP-N-acetylmuramyl pentapeptide phosphotransferase/UDP-N-acetylglucosamine-1-phosphate transferase
Ksed_18600	1935021	1936262		glycosyltransferase
Ksed_18650	1940538	1941413		hypothetical protein	Y	25
Ksed_18660	1941410	1942255		sulfotransferase family protein
Ksed_18670	1942252	1943121		predicted xylanase/chitin deacetylase
Ksed_18680	1943118	1943951		sulfotransferase family protein
Ksed_18690	1943939	1944577		acetyltransferase (isoleucine patch superfamily)
Ksed_18700	1944574	1945854		membrane protein involved in the export of O-antigen and teichoic acid
Ksed_18710	1946168	1946467		Transposase
Ksed_18730	1947416	1948897	c	hypothetical protein
Ksed_18740	1948894	1949856	c	hypothetical protein
Ksed_18750	1949849	1951012	c	hypothetical protein
Ksed_18760	1951112	1952377	c	sulfate adenylyltransferase subunit 1
Ksed_18770	1952377	1953288	c	sulfate adenylyltransferase subunit 2
Ksed_18780	1953387	1954286	c	Putative capsular polysaccharide synthesis protein
Ksed_18790	1954344	1955474		adenylylsulfate kinase ApsK
Ksed_18800	1955471	1956442		predicted permease
Ksed_18810	1956518	1957261	c	hypothetical protein
Ksed_18820	1957372	1958196		uncharacterized conserved protein
Ksed_18830	1958326	1959006		predicted membrane protein
Ksed_18840	1959023	1960069		5-enolpyruvylshikimate-3-phosphate synthase
Ksed_18860	1960518	1960604		hypothetical protein
Ksed_18870	1960610	1961623	c	UDP-galactose 4-epimerase
Ksed_18880	1961935	1963995		hypothetical protein
Ksed_18890	1963965	1965425		glycosyltransferase
Ksed_18900	1965425	1966750		hypothetical protein
Ksed_18910	1966747	1967451		hypothetical protein
Ksed_19010	1974431	1974553	c	hypothetical protein		1
Ksed_19820	2067010	2067567	c	Protein of unknown function (DUF664)		1
Ksed_19860	2070987	2071913		cation diffusion facilitator family transporter	Y	37
Ksed_19870	2071954	2072589		hypothetical protein
Ksed_19880	2072652	2073023	c	hypothetical protein
Ksed_19890	2073085	2076009	c	P-type ATPase, translocating
Ksed_19900	2076059	2076325	c	hypothetical protein
Ksed_19910	2076734	2076964		hypothetical protein
Ksed_19920	2077054	2077224
Ksed_19930	2077228	2077596	c	uncharacterized conserved protein
Ksed_19940	2077593	2077895	c	predicted nucleotidyltransferase
Ksed_19950	2077955	2078293	c	uncharacterized conserved protein
Ksed_19960	2078297	2078998	c	dinucleotide-utilizing enzyme possibly involved in molybdopterin or thiamin biosynthesis
Ksed_19970	2078988	2079533	c	molybdopterin synthase subunit MoaE
Ksed_19980	2079548	2080462		molybdenum cofactor synthesis domain protein
Ksed_19990	2080459	2080935		GTP cyclohydrolase subunit MoaC
Ksed_20000	2080969	2081451	c	molybdopterin adenylyltransferase
Ksed_20010	2081476	2082492		GTP cyclohydrolase subunit MoaA
Ksed_20020	2082498	2082737		hypothetical protein
Ksed_20030	2082734	2083354		molybdopterin-guanine dinucleotide biosynthesis protein A
Ksed_20040	2083332	2084195	c	NifC-like ABC-type porter/molybdate ABC transporter, permease protein
Ksed_20050	2084192	2084887	c	molybdenum ABC transporter, periplasmic molybdate-binding protein
Ksed_20060	2085137	2085634		hypothetical protein
Ksed_20070	2085741	2086424		hypothetical protein
Ksed_20080	2086387	2087739	c	predicted membrane protein
Ksed_20090	2087736	2091770	c	amino acid adenylation enzyme/thioester reductase family protein
Ksed_20100	2091891	2092904	c	predicted membrane protein
Ksed_20110	2093001	2093381		uncharacterized conserved protein
Ksed_20120	2093414	2094085	c	cAMP-binding protein
Ksed_20130	2094194	2094424		cation transport ATPase
Ksed_20140	2094476	2096362		heavy metal-translocating P-loop ATPase
Ksed_20150	2096517	2096816		Transposase
Ksed_20160	2096813	2097685		transposase
Ksed_20170	2097790	2098116		hypothetical protein
Ksed_20190	2099375	2100724		transposase
Ksed_20220	2103217	2104464	c	drug resistance transporter, Bcr/CflA subfamily
Ksed_20230	2104597	2105325		hypothetical protein
Ksed_20240	2105328	2105984	c	phosphopantetheinyl transferase
Ksed_20250	2105981	2106670	c	hypothetical protein
Ksed_20280	2108572	2109075		transcriptional regulator, effector-binding domain/component		6
Ksed_20290	2109117	2109950		predicted transcriptional regulator
Ksed_20300	2109947	2110315		hypothetical protein
Ksed_20310	2110419	2111795		site-specific recombinase, DNA invertase Pin
Ksed_20320	2111978	2112190		hypothetical protein
Ksed_20330	2112190	2112438		hypothetical protein
Ksed_20380	2116517	2116888	c	lactoylglutathione lyase-like lyase		1
Ksed_21100	2181045	2181344	c	Transposase	Y	1
Ksed_21130	2182701	2182946		hypothetical protein	Y	3
Ksed_21140	2183065	2184417	c	transposase family protein
Ksed_21460	2218025	2219332		transposase family protein
Ksed_21720	2250523	2250771	c	LSU ribosomal protein L31P		5
Ksed_21730	2250809	2250970	c
Ksed_21740	2250985	2251148	c
Ksed_21750	2251330	2253417		DNA/RNA helicase, superfamily I
Ksed_21760	2253526	2253903	c	hypothetical protein
Ksed_21960	2273540	2274763		Major Facilitator Superfamily transporter	Y	7
Ksed_21970	2274833	2276209	c	predicted phosphatase
Ksed_21980	2276368	2278497	c	hypothetical protein
Ksed_21990	2278506	2280404	c
Ksed_22000	2278723	2279526	c	transposase
Ksed_22010	2279589	2279924	c	Transposase
Ksed_22020	2280484	2280723	c	hypothetical protein
Ksed_22140	2291523	2293106	c	putative exporter of polyketide antibiotics		3
Ksed_22150	2293103	2294077	c	ABC-type multidrug transport system, ATPase component
Ksed_22160	2294202	2295194	c	LAO/AO transport system ATPase
Ksed_22240	2303480	2304607	c	hypothetical protein		1
Ksed_22400	2317840	2319204		transposase family protein	Y	1
Ksed_22430	2322137	2323588		H+/gluconate symporter family protein		3
Ksed_22450	2324480	2326807	c	cytochrome P450
Ksed_22460	2327117	2327683		hypothetical protein
Ksed_22550	2336206	2337759	c	anion transporter		4
Ksed_22560	2337897	2338214		predicted acyltransferase
Ksed_22570	2338274	2338987		hypothetical protein
Ksed_22580	2339115	2339783		hypothetical protein
Ksed_22640	2342280	2344367		uncharacterized conserved protein	Y	25
Ksed_22650	2344518	2345387		hypothetical protein
Ksed_22660	2345468	2345971
Ksed_22670	2346398	2347186		hypothetical protein
Ksed_22690	2348412	2349755	c	SH3 domain-containing protein
Ksed_22700	2349985	2350104		hypothetical protein
Ksed_22710	2350213	2350584		hypothetical protein
Ksed_22720	2350600	2350758		hypothetical protein
Ksed_22730	2350879	2351426
Ksed_22750	2352524	2354404	c	Calcineurin-like phosphoesterase
Ksed_22760	2354495	2355385	c	hypothetical protein
Ksed_22770	2355553	2356464		hypothetical protein
Ksed_22780	2356461	2357393		protein of unknown function (DUF1814)
Ksed_22790	2357668	2358624		integrase family protein
Ksed_22800	2358688	2360622		type I restriction-modification system methyltransferase subunit
Ksed_22810	2360619	2361875		hypothetical protein
Ksed_22820	2361880	2364900		type I restriction enzyme R protein
Ksed_22830	2364897	2365817		restriction endonuclease
Ksed_22850	2367467	2368954	c	hypothetical protein
Ksed_22860	2368951	2369985	c	uncharacterized conserved protein
Ksed_22870	2369995	2371101	c	uncharacterized conserved protein
Ksed_22880	2371098	2372186	c	uncharacterized conserved protein
Ksed_22890	2372186	2373733	c	N-methylhydantoinase A/acetone carboxylase, beta subunit
Ksed_22900	2373765	2375132	c	purine-cytosine permease-like transporter
Ksed_22910	2375513	2375620	c	hypothetical protein
Ksed_22960	2380507	2383695		hypothetical protein		9
Ksed_22970	2383911	2384027	c	hypothetical protein
Ksed_22980	2384055	2385179	c
Ksed_22990	2385703	2386374	c	transcriptional regulator
Ksed_23000	2386481	2387413		nucleoside-diphosphate-sugar epimerase
Ksed_23010	2387532	2388596		hypothetical protein
Ksed_23020	2388630	2389292	c	hypothetical protein
Ksed_23030	2389416	2390141	c	Uncharacterized protein conserved in bacteria (DUF2176)
Ksed_23040	2390207	2391169	c	uncharacterized conserved protein (DUF2186)
Ksed_23300	2418454	2419608	c	hypothetical protein		2
Ksed_23310	2419625	2419963	c	hypothetical protein
Ksed_23480	2435335	2436651		transposase family protein	Y	5
Ksed_23490	2436721	2438085	c	transposase family protein
Ksed_23500	2438581	2439501		DNA-binding domain-containing protein, AraC-type
Ksed_23510	2439676	2440092	c	predicted transcriptional regulator
Ksed_23520	2440390	2440737
Ksed_23550	2442283	2443533	c	arabinose efflux permease family protein		4
Ksed_23560	2443603	2444019		transcriptional regulator, MerR family
Ksed_23570	2444181	2444984	c	ABC-type polysaccharide/polyol phosphate export systems, permease component
Ksed_23580	2444981	2445955	c	daunorubicin resistance ABC transporter ATP-binding subunit
Ksed_23610	2448027	2448915	c		Y	23
Ksed_23620	2449391	2449621		hypothetical protein
Ksed_23630	2450367	2451527	c	phosphoenolpyruvate synthase/pyruvate phosphate dikinase
Ksed_23640	2451587	2451982		hypothetical protein
Ksed_23650	2451979	2452614		hypothetical protein
Ksed_23660	2452763	2453431	c	response regulator containing a CheY-like receiver domain and an HTH DNA-binding domain
Ksed_23670	2453428	2454642	c	signal transduction histidine kinase
Ksed_23680	2454784	2455683		ABC-type multidrug transport system, ATPase component
Ksed_23690	2455680	2456432		hypothetical protein
Ksed_23700	2456437	2457183		uncharacterized conserved protein
Ksed_23710	2457211	2457474		hypothetical protein
Ksed_23720	2457556	2458599		DNA-binding domain-containing protein, AraC-type
Ksed_23730	2458837	2459960	c
Ksed_23740	2459960	2460439	c	transcriptional regulator
Ksed_23750	2460436	2461092	c	hypothetical protein
Ksed_23760	2461184	2461519	c	hypothetical protein
Ksed_23770	2461548	2462552	c	integrase family protein
Ksed_23780	2462549	2463733	c	arabinose efflux permease family protein
Ksed_23790	2463981	2464337	c	hypothetical protein
Ksed_23800	2464385	2464735	c	hypothetical protein
Ksed_23810	2464764	2465399	c	putative NADH-flavin reductase
Ksed_23820	2465487	2465936		transcriptional regulator
Ksed_23840	2467451	2469009
Ksed_23990	2482988	2483419	c	Integral membrane protein possibly involved in chromosome condensation		2
Ksed_24000	2483419	2483808	c	Integral membrane protein possibly involved in chromosome condensation
Ksed_24050	2488278	2489030	c	pyridoxamine-phosphate oxidase		1
Ksed_24500	2530334	2530786	c	hypothetical protein		2
Ksed_24510	2531101	2531829		hypothetical protein
Ksed_25000	2579330	2580121	c	DNA-binding domain-containing protein, AraC-type		4
Ksed_25010	2580294	2580788		uncharacterized conserved protein
Ksed_25020	2580795	2581199	c	predicted nucleic-acid-binding protein, contains PIN domain
Ksed_25030	2581196	2581435	c	looped-hinge helix DNA binding domain, AbrB family
Ksed_25060	2585910	2586491		dihydrofolate reductase		1
Ksed_25100	2588063	2588230	c	hypothetical protein		1
Ksed_25180	2596330	2596950	c	transcriptional regulator, tetR family		2
Ksed_25190	2597049	2597753		hypothetical protein
Ksed_25580	2630065	2631315		predicted acyl-CoA transferase/carnitine dehydratase	Y	9
Ksed_25590	2631440	2631838	c
Ksed_25610	2633431	2633820	c	predicted transcriptional regulator
Ksed_25620	2633925	2635349		mercuric reductase
Ksed_25630	2635337	2636020		Alkylmercury lyase
Ksed_25640	2636165	2637493		transposase family protein
Ksed_25650	2637548	2638546		hypothetical protein
Ksed_25660	2638557	2639051	c	hypothetical protein
Ksed_25670	2639522	2639857		hypothetical protein
Ksed_25750	2644840	2645436	c	predicted permease, cadmium resistance protein		7
Ksed_25760	2645801	2646271	c	lipoprotein signal peptidase
Ksed_25770	2646292	2648262	c	heavy metal-translocating P-loop ATPase
Ksed_25780	2648259	2648618	c	transcriptional regulator, ArsR family
Ksed_25790	2648724	2649324
Ksed_25800	2649396	2650334		ABC-type multidrug transport system, ATPase component
Ksed_25810	2650331	2651929		putative exporter of polyketide antibiotics
Ksed_26210	2690605	2690970		Protein of unknown function (DUF1696)		1
Ksed_26310	2699059	2699901	c	RNA polymerase sigma factor, sigma-70 family		2
Ksed_26320	2699898	2700329	c	alkylhydroperoxidase AhpD family core domain protein
Ksed_26360	2704702	2705322	c	hypothetical protein		4
Ksed_26370	2705370	2706596	c	hypothetical protein
Ksed_26380	2706602	2707357	c	ABC-type multidrug transport system, ATPase component
Ksed_26390	2707369	2707809	c	hypothetical protein
Ksed_26800	2754682	2756535		glycosyl transferase		6
Ksed_26810	2756574	2758745		glycosyltransferase
Ksed_26820	2758770	2760932	c	predicted acyltransferase
Ksed_26830	2761106	2762995	c	uncharacterized conserved protein
Ksed_26840	2762995	2764104	c	UDP-N-acetylglucosamine 2-epimerase
Ksed_26850	2764348	2766069		glycosyltransferase
